# Supplementary material for: Synthesis of substituted phenylcarbamates of N-cyclobutylformylated chitosan and their application as chiral selectors in enantioseparation
Source: Royal Society of Chemistry journal article supplement (doi:10.1039/c6an00311g), 2016-01-01
Supplement: c6an00311g1.pdf [file c6an00311g1.pdf]

**Supplementary Information**  
*for*  
**Synthesis of substituted phenylcarbamates of *N*-  
cyclobutylformylated chitosan and their application  
as chiral selectors in enantioseparation**

Juan Zhang, Xiao-Chen Wang, Wei Chen, Zheng-Wu Bai\*

School of Chemistry and Environmental Engineering, Wuhan Institute of Technology,

Wuhan 430073, China

\*Corresponding authors at: School of Chemistry and Environmental Engineering,  
Wuhan Institute of Technology, Wuhan 430073, China.

Tel. and fax: +86 27 87195680;

E-mail address: [zwbai@wit.edu.cn](mailto:zwbai@wit.edu.cn) (Z.-W. Bai)

# Table of Contents

|                                                                                                                                    |   |
|------------------------------------------------------------------------------------------------------------------------------------|---|
| <b>1. Characterization of chitosan and its derivatives</b> .....                                                                   | 1 |
| Fig. S1 <sup>1</sup> H NMR spectrum of chitosan.....                                                                               | 1 |
| Fig. S2 IR spectrum (A) and <sup>1</sup> H NMR spectra (B) of <i>N</i> -cyclobutylformylated chitosan.....                         | 2 |
| Fig. S3. <sup>1</sup> H NMR spectrum of chitosan bis(4-methylphenylcarbamate)-( <i>N</i> -cyclobutylformamide) (CS 1).....         | 3 |
| Fig. S4 <sup>1</sup> H NMR spectrum of chitosan bis(3-chloro-4-methylphenylcarbamate)-( <i>N</i> -cyclobutylformamide) (CS 2)..... | 3 |
| Fig. S5 <sup>1</sup> H NMR spectrum of chitosan bis(4-chlorophenylcarbamate)-( <i>N</i> -cyclobutylformamide) (CS 3).....          | 4 |
| Fig. S6 <sup>1</sup> H NMR spectrum of chitosan bis(3,5-dimethylphenylcarbamate)-( <i>N</i> -cyclobutylformamide) (CS 4).....      | 4 |
| Fig. S7 <sup>1</sup> H NMR spectrum of chitosan bis(3-methylphenylcarbamate)-( <i>N</i> -cyclobutylformamide) (CS 5).....          | 5 |
| Fig. S8 <sup>1</sup> H NMR spectrum of chitosan bis(phenylcarbamate)-( <i>N</i> -cyclobutylformamide) (CS 6).....                  | 5 |
| Fig. S9 <sup>1</sup> H NMR spectrum of chitosan bis(3-chlorophenylcarbamate)-( <i>N</i> -cyclobutylformamide) (CS 7).....          | 6 |
| Table S1. Elemental analysis of chitosan derivatives.....                                                                          | 6 |
| Table S2. Characterization of chitosan derivatives by IR.....                                                                      | 7 |
| <b>2. Enantioseparation comparison of CSPs</b> .....                                                                               | 8 |
| Table S3. Enantioseparation results on CSPs I and II.....                                                                          | 9 |

## 1. Characterization of chitosan and its derivatives

$^1\text{H}$  NMR spectra of chitosan and *N*-cyclobutylformylated chitosan were measured with deuterated trifluoroacetic acid (TFA-D) as the solvent at 25 °C. TFA-D was also employed as internal standard ( $\delta$  11.50 ppm).  $^1\text{H}$  NMR spectra of substituted phenylcarbamates of *N*-cyclobutylformylated chitosan were measured at 90 °C with DMSO- $d_6$  as the solvent, scanning 256 times. Elemental analysis was conducted in a usual C, H and N model. IR spectra were measured with KBr pellets.

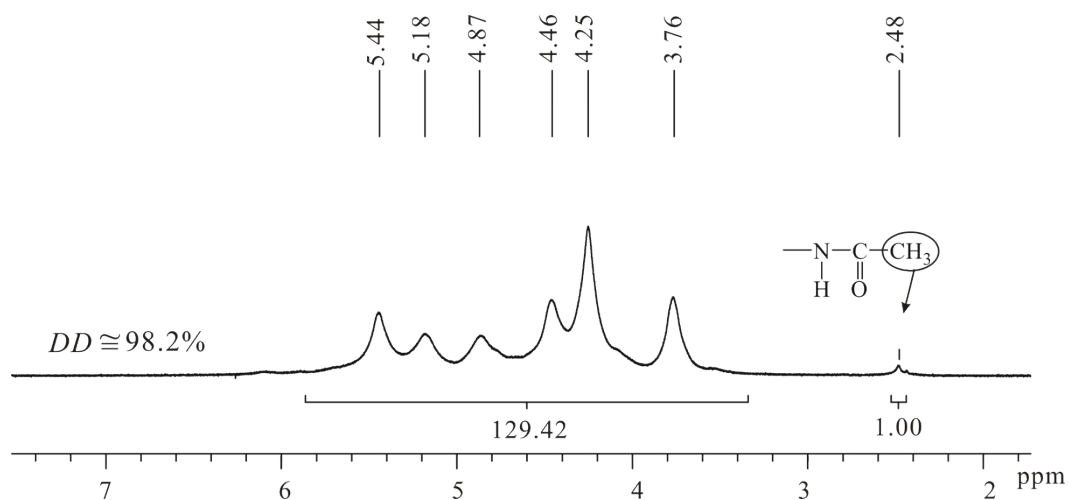

Fig. S1  $^1\text{H}$  NMR spectrum of chitosan.

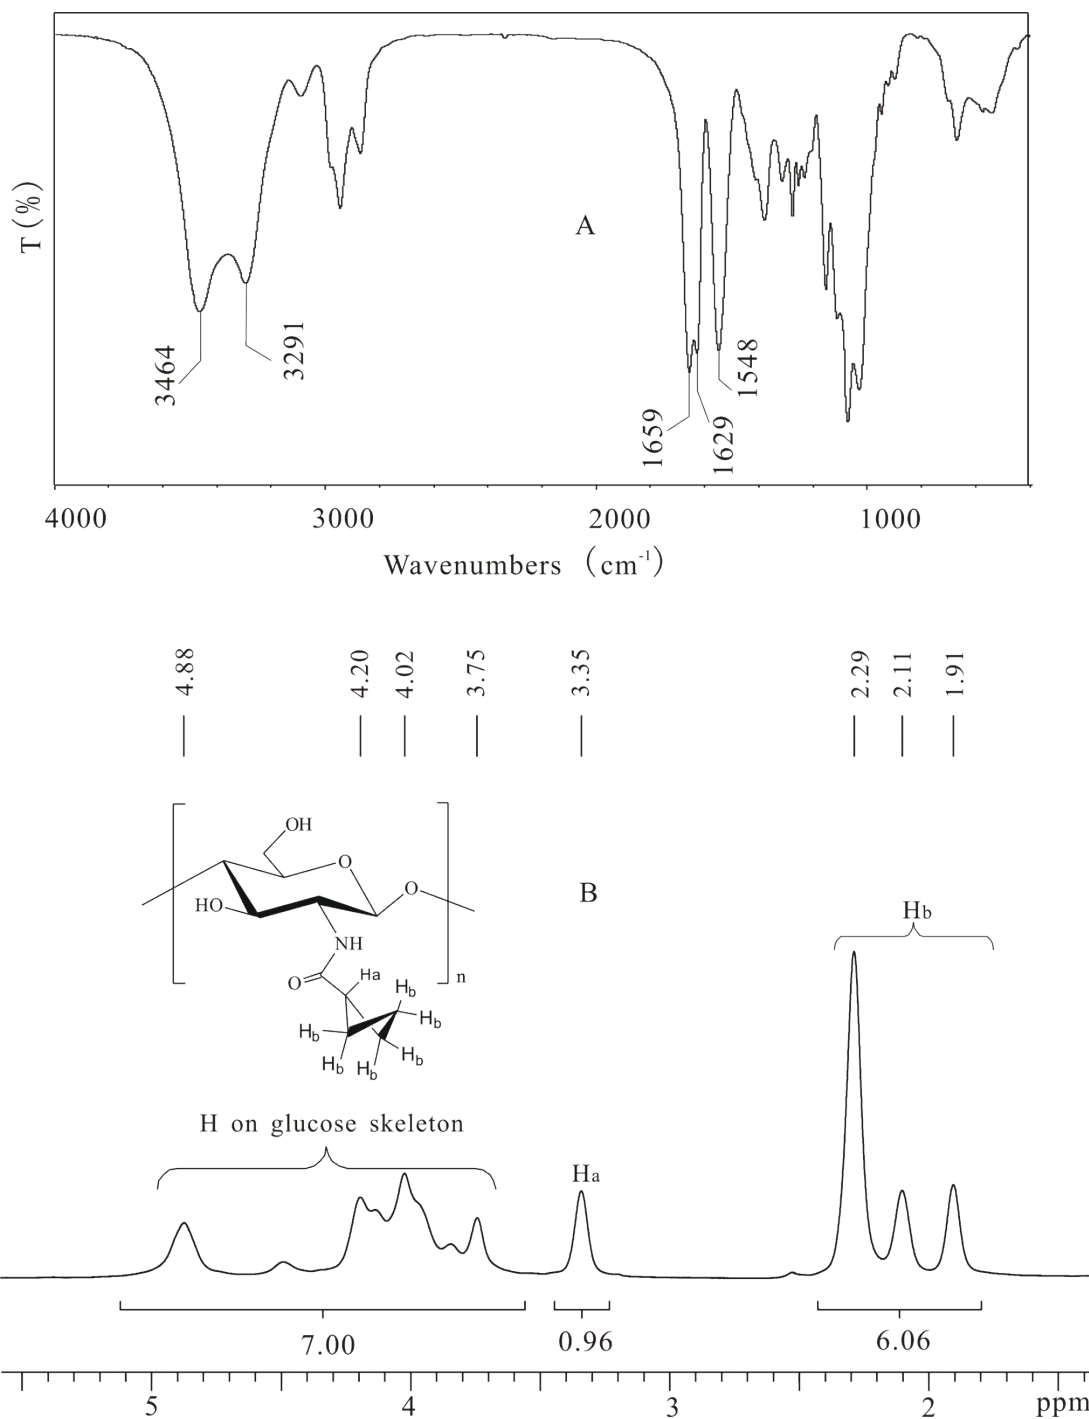

Fig. S2 IR (A) and  $^1\text{H}$  NMR spectra (B) of N-cyclobutylformylated chitosan.

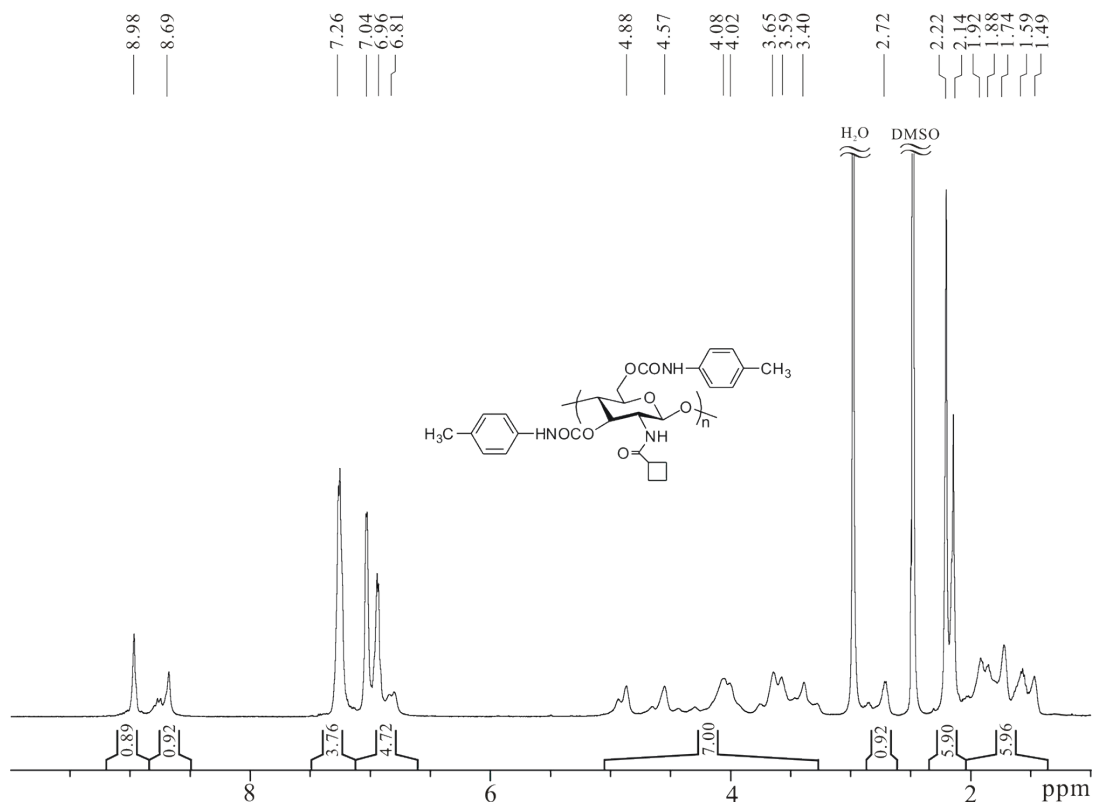

Fig. S3  $^1\text{H}$  NMR spectrum of chitosan bis(4-methylphenylcarbamate)-(cyclobutylformamide) (CS 1).

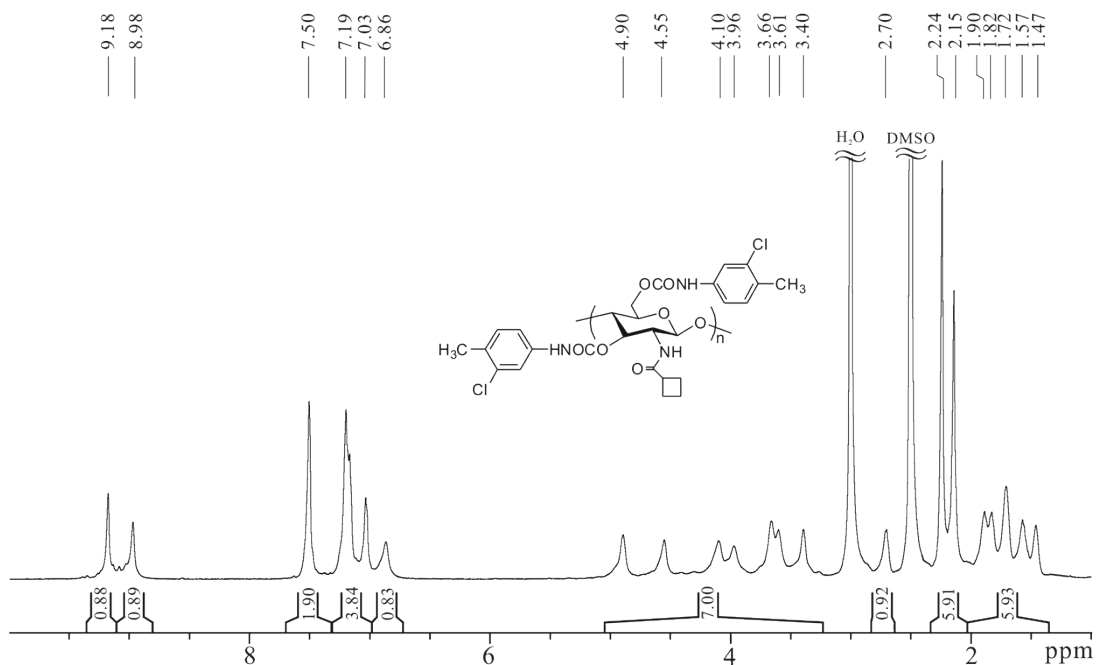

Fig. S4  $^1\text{H}$  NMR spectrum of chitosan bis(3-chloro-4-methylphenylcarbamate)-(cyclobutylformamide) (CS 2).

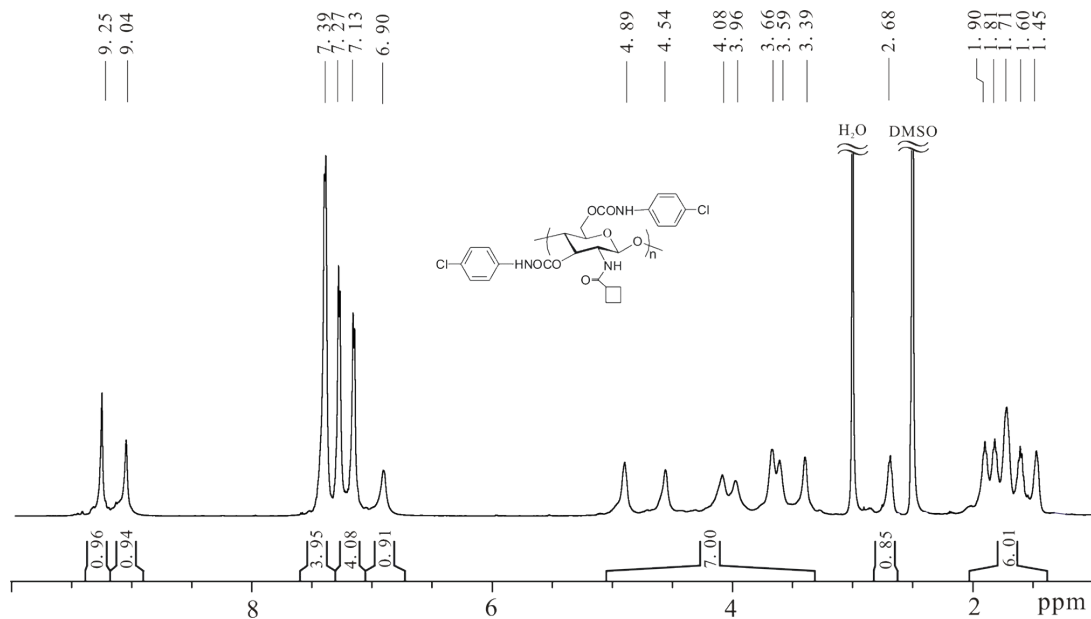

Fig. S5  $^1\text{H}$  NMR spectrum of chitosan bis(4-chlorophenylcarbamate)-(cyclobutylformamide) (CS 3).

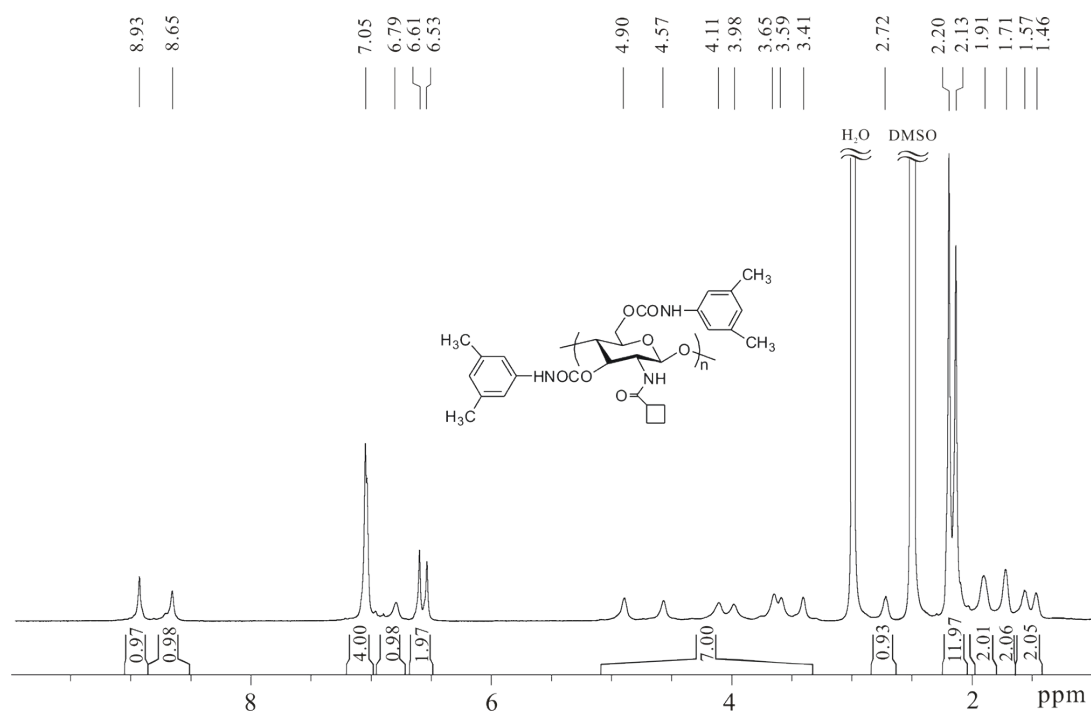

Fig. S6  $^1\text{H}$  NMR spectrum of chitosan bis(3,5-dimethylphenylcarbamate)-(cyclobutylformamide) (CS 4).

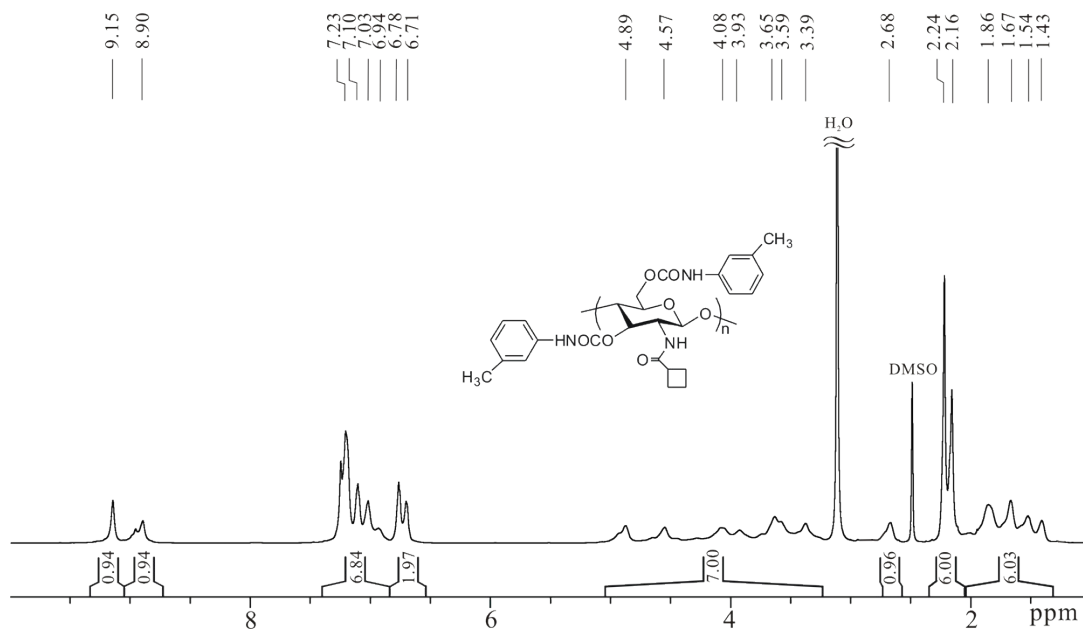

Fig. S7  $^1\text{H}$  NMR spectrum of chitosan bis(3-methylphenylcarbamate)-(cyclobutylformamide) (CS 5).

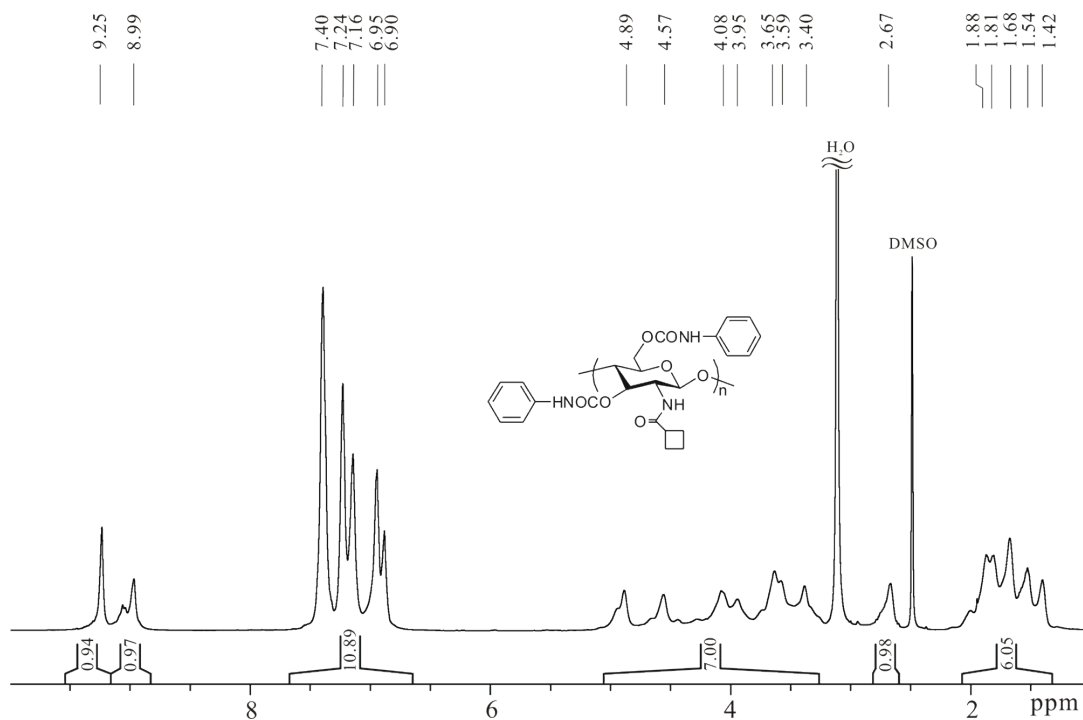

Fig. S8  $^1\text{H}$  NMR spectrum of chitosan bis(phenylcarbamate)-(cyclobutylformamide) (CS 6).

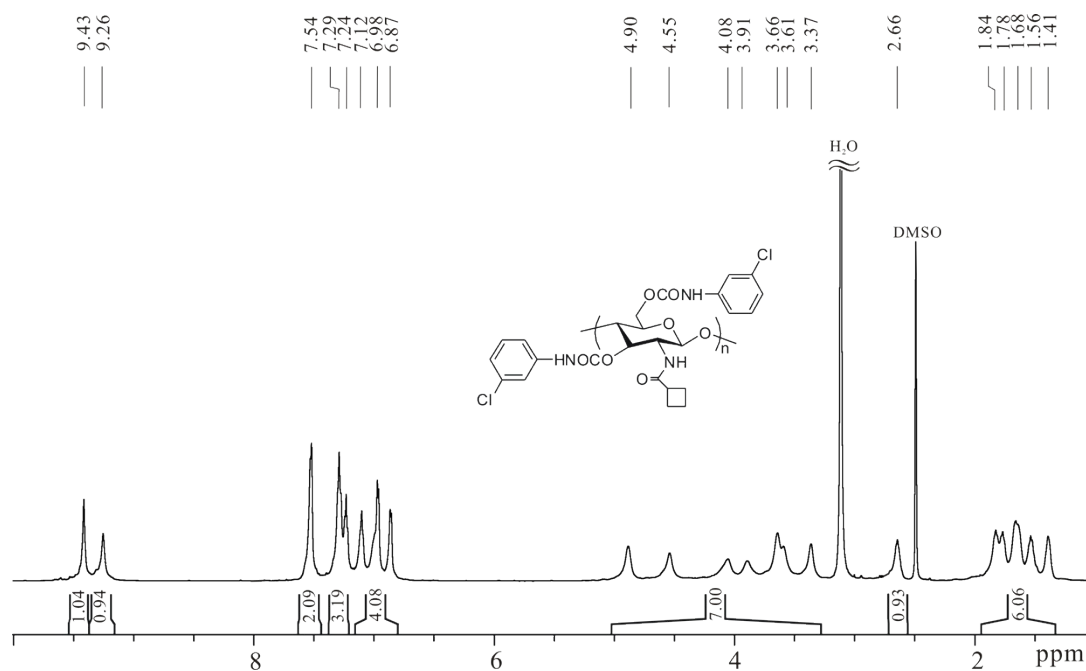

Fig. S9  $^1\text{H}$  NMR spectrum of chitosan bis(3-chlorophenylcarbamate)-(cyclobutylformamide) (CS 7).

Table S1. Elemental analysis of chitosan derivatives

| Derivatives                                                                                         | Calculated (%) |      |      | Found (%) |      |      |
|-----------------------------------------------------------------------------------------------------|----------------|------|------|-----------|------|------|
|                                                                                                     | C              | H    | N    | C         | H    | N    |
| CS 1<br>( $\text{C}_{27}\text{H}_{31}\text{N}_3\text{O}_7 \cdot 0.5\text{H}_2\text{O}$ )            | 62.54          | 6.22 | 8.10 | 62.20     | 6.32 | 7.71 |
| CS 2<br>( $\text{C}_{27}\text{H}_{29}\text{Cl}_2\text{N}_3\text{O}_7$ )                             | 56.06          | 5.05 | 7.26 | 55.59     | 5.18 | 6.69 |
| CS 3<br>( $\text{C}_{25}\text{H}_{25}\text{Cl}_2\text{N}_3\text{O}_7$ )                             | 54.56          | 4.58 | 7.63 | 54.29     | 4.99 | 7.61 |
| CS 4<br>( $\text{C}_{29}\text{H}_{35}\text{N}_3\text{O}_7 \cdot 0.5\text{H}_2\text{O}$ )            | 63.72          | 6.64 | 7.69 | 63.32     | 6.65 | 7.28 |
| CS 5<br>( $\text{C}_{27}\text{H}_{31}\text{N}_3\text{O}_7 \cdot 0.75\text{H}_2\text{O}$ )           | 62.00          | 6.26 | 8.03 | 61.70     | 6.28 | 7.60 |
| CS 6<br>( $\text{C}_{25}\text{H}_{27}\text{N}_3\text{O}_7 \cdot 0.75\text{H}_2\text{O}$ )           | 60.66          | 5.80 | 8.49 | 60.16     | 5.91 | 7.95 |
| CS 7<br>( $\text{C}_{25}\text{H}_{25}\text{Cl}_2\text{N}_3\text{O}_7 \cdot 0.5\text{H}_2\text{O}$ ) | 53.68          | 4.68 | 7.51 | 53.84     | 4.84 | 7.10 |



Table S2. IR spectra data of chitosan derivatives

| Derivatives | IR (KBr, cm <sup>-1</sup> ) $\nu$                                                                                   |
|-------------|---------------------------------------------------------------------------------------------------------------------|
| CS 1        | 3333 (-NH-), 3099-3012 (Ph-H), 2986-2864 (-C-H), 1719 (-CO <sub>2</sub> -),<br>1665, 1612, 1543 (-CONH-, -Ph)       |
| CS 2        | 3405-3325 (-NH-), 3099-3042 (Ph-H), 2982-2863 (-C-H), 1718 (-<br>CO <sub>2</sub> -), 1661, 1584, 1525 (-CONH-, -Ph) |
| CS 3        | 3408-3325 (-NH-), 3119-3063 (Ph-H), 2982-2869 (-C-H), 1718 (-<br>CO <sub>2</sub> -), 1659, 1596, 1525 (-CONH-, -Ph) |
| CS 4        | 3331 (-NH-), 3128-3036 (Ph-H), 2982-2869 (-C-H), 1721 (-CO <sub>2</sub> -),<br>1661, 1602, 1525 (-CONH-, -Ph)       |
| CS 5        | 3328 (-NH-), 3149-3045 (Ph-H), 2982-2861 (-C-H), 1718 (-CO <sub>2</sub> -),<br>1664, 1617, 1542 (-CONH-, -Ph)       |
| CS 6        | 3393-3322 (-NH-), 3134-3063 (Ph-H), 2988-2866 (-C-H), 1721 (-<br>CO <sub>2</sub> -), 1661, 1602, 1528 (-CONH-, -Ph) |
| CS 7        | 3405-3316 (-NH-), 3119-3072 (Ph-H), 2988-2869 (-C-H), 1721 (-<br>CO <sub>2</sub> -), 1659, 1593, 1531 (-CONH-, -Ph) |

## 2. Enantioseparation comparison of CSPs

The enantioseparation capability of newly prepared CSPs was evaluated in *n*-hexane/2-propanol (90/10, v/v), *n*-hexane/ethanol (90/10, v/v) and *n*-hexane/ethanol/methanol/ (90/10, v/v) with the same chiral analytes. These capabilities were compared to those of CSPs I and II prepared from cellulose tris(3,5-dimethylphencarbamate) (CDMPC) and amylose tris(3,5-dimethylphencarbamate) (ADMPC), respectively.

Table S3. Enantioseparation of CSP I and CSP II

| No.      | CSP I   |          |       | CSP II  |          |       | No.       | CSP I                 |          |       | CSP II   |          |       | M.P. |
|----------|---------|----------|-------|---------|----------|-------|-----------|-----------------------|----------|-------|----------|----------|-------|------|
|          | $k_1$   | $\alpha$ | $R_s$ | $k_1$   | $\alpha$ | $R_s$ |           | $k_1$                 | $\alpha$ | $R_s$ | $k_1$    | $\alpha$ | $R_s$ |      |
| <b>1</b> | 0.65(+) | 1.51     | 1.68  | 1.03(+) | 1.49     | 2.12  | <b>8</b>  | 6.11(R)               | 2.09     | 3.00  | 7.61(R)  | 1.25     | 0.39  | A    |
|          | 0.54(+) | 1.87     | 3.07  | 0.70(+) | 1.64     | 2.62  |           | 1.32(R)               | 1.41     | 1.60  | 1.42(R)  | 1.28     | 1.19  | B    |
|          | 0.66(+) | 1.79     | 3.79  | 0.72(+) | 1.64     | 2.63  |           | 1.57(R)               | 1.21     | 1.37  | 1.05(R)  | 1.20     | 0.89  | C    |
| <b>2</b> | 1.24(+) | 1.20     | 1.37  | 1.53(-) | 1.30     | 1.80  | <b>9</b>  | 2.42(+)               | 1.57     | 2.45  | 5.71     | 1.00     | 0.00  | A    |
|          | 1.19(+) | 1.46     | 2.94  | 1.15(-) | 1.21     | 1.14  |           | 1.37(+)               | 2.98     | 6.28  | 1.75     | 1.00     | 0.00  | B    |
|          | 1.43(+) | 1.79     | 5.00  | 1.09(-) | 1.21     | 1.19  |           | 1.72(+)               | 2.87     | 6.98  | 1.36     | 1.00     | 0.00  | C    |
| <b>3</b> | 1.19    | 1.00     | 0.00  | 2.09    | 1.00     | 0.00  | <b>10</b> | 5.16(R)               | 1.70     | 3.15  | 4.52(R)  | 1.18     | 1.01  | A    |
|          | 0.68(+) | 1.06     | 0.28  | 1.34    | 1.00     | 0.00  |           | 1.22(R)               | 1.46     | 2.04  | 1.15(R)  | 1.12     | 0.53  | B    |
|          | 0.98    | 1.00     | 0.00  | 1.24    | 1.00     | 0.00  |           | 1.58(R)               | 1.27     | 1.45  | 1.10(R)  | 1.16     | 0.54  | C    |
| <b>4</b> | 2.95(-) | 1.06     | 0.48  | 3.74(+) | 1.10     | 0.57  | <b>11</b> | 3.99                  | 1.00     | 0.00  | 2.90(+)  | 1.40     | 2.17  | A    |
|          | 1.71    | 1.00     | 0.00  | 1.90    | 1.00     | 0.00  |           | 2.60(+)               | 1.08     | 0.48  | 2.06(+)  | 1.33     | 1.93  | B    |
|          | 2.29    | 1.00     | 0.00  | 1.60    | 1.00     | 0.00  |           | 2.76(+)               | 1.10     | 0.85  | 1.85(+)  | 1.34     | 1.96  | C    |
| <b>5</b> | 0.63    | 1.00     | 0.00  | 0.95(+) | 1.12     | 0.42  | <b>12</b> | 10.01(R)              | 1.45     | 1.75  | 11.74(S) | 1.20     | 0.96  | A    |
|          | 0.43    | 1.00     | 0.00  | 0.65(+) | 1.13     | 0.22  |           | 1.97(R)               | 1.28     | 1.33  | 2.25(S)  | 1.12     | 0.38  | B    |
|          | 0.69    | 1.00     | 0.00  | 0.57(+) | 1.13     | 0.38  |           | 2.36(R)               | 1.21     | 1.47  | 2.50(S)  | 1.10     | 0.35  | C    |
| <b>6</b> | 4.25    | 1.82     | 2.73  | 6.38    | 1.23     | 0.85  | <b>13</b> | Retention time>120min |          |       | 39.05    | 1.00     | 0.00  | A    |
|          | 2.57    | 3.82     | 7.18  | 3.27    | 1.25     | 1.25  |           | Retention time>120min |          |       | 24.36    | 1.00     | 0.00  | B    |
|          | 2.55    | 4.51     | 9.59  | 2.42    | 1.31     | 1.64  |           | Retention time>120min |          |       | 12.20    | 1.00     | 0.00  | C    |
| <b>7</b> | 5.71(R) | 1.27     | 1.46  | 9.85(S) | 1.09     | 0.96  | <b>14</b> | 1.65                  | 1.00     | 0.00  | 2.49     | 1.00     | 0.00  | A    |
|          | 3.23(R) | 1.11     | 0.77  | 4.89    | 1.00     | 0.00  |           | 1.46                  | 1.00     | 0.00  | 1.37     | 1.00     | 0.00  | B    |
|          | 4.10    | 1.00     | 0.00  | 3.82(R) | 1.10     | 0.45  |           | 1.95                  | 1.00     | 0.00  | 1.23     | 1.00     | 0.00  | C    |

Table S3 to be continued

Continued Table S3

| No.       | CSP I                 |          |       | CSP II   |          |       | No.       | CSP I       |          |       | CSP II      |          |       | M.P. |
|-----------|-----------------------|----------|-------|----------|----------|-------|-----------|-------------|----------|-------|-------------|----------|-------|------|
|           | $k_1$                 | $\alpha$ | $R_s$ | $k_1$    | $\alpha$ | $R_s$ |           | $k_1$       | $\alpha$ | $R_s$ | $k_1$       | $\alpha$ | $R_s$ |      |
| <b>15</b> | 1.14(S)               | 1.22     | 0.84  | 1.62(R)  | 1.34     | 1.60  | <b>18</b> | 4.49(S)     | 1.06     | 0.25  | 2.97(S)     | 1.06     | 0.29  | A    |
|           | 0.58(S)               | 1.12     | 0.32  | 0.83(R)  | 1.34     | 1.55  |           | 2.72(R)     | 1.35     | 0.80  | 1.73        | 1.00     | 0.00  | B    |
|           | 0.97                  | 1.00     | 0.00  | 0.73(R)  | 1.21     | 0.47  |           | 1.96(R)     | 1.39     | 1.78  | 1.80        | 1.00     | 0.00  | C    |
| <b>16</b> | 25.10                 | 1.00     | 0.00  | 32.69(R) | 1.30     | 1.27  | <b>19</b> | 5.62(2R,3S) | 1.16     | 0.78  | 19.21       | 1.00     | 0.00  | A    |
|           | 7.73(R)               | 1.63     | 2.20  | 11.45(R) | 1.18     | 0.99  |           | 4.65(2R,3S) | 1.18     | 1.11  | 9.47(2R,3S) | 1.29     | 1.81  | B    |
|           | 9.07(R)               | 1.50     | 2.98  | 7.77(R)  | 1.13     | 0.68  |           | 3.81(2R,3S) | 1.17     | 1.16  | 6.53(2R,3S) | 1.27     | 1.82  | C    |
| <b>17</b> | Retention time>120min |          |       | 17.56(R) | 1.28     | 0.43  |           |             |          |       |             |          |       | A    |
|           | 10.37(R)              | 1.61     | 2.57  | 6.37(R)  | 1.25     | 0.99  |           |             |          |       |             |          |       | B    |
|           | 9.62(R)               | 1.79     | 3.63  | 3.94(R)  | 1.15     | 0.54  |           |             |          |       |             |          |       | C    |

No.: series number of chiral analytes; M.P.: A: *n*-hexane/2-propanol (90/10, v/v); B: *n*-hexane/ethanol (90/10, v/v); C: *n*-hexane/ethanol/methanol (90/5/5, v/v/v). “R”, “S”, “+”, “-” and “2R, 3S” refer to the first-eluted enantiomer. The elution order of analyte 6 was not available because of its low optical rotation.
